# Supplementary material for: Post-synthetically modified metal–porphyrin framework GaTCPP for carbon dioxide adsorption and energy storage in Li–S batteries
Source: Royal Society of Chemistry journal article supplement (doi:10.1039/d2ra03301a), 2022-01-01
Supplement: d2ra03301a1.pdf [file d2ra03301a1.pdf]

## Electronic supplementary information

# Post-synthetically Modified Metal-porphyrin Framework GaTCPP for Carbon Dioxide Adsorption and Energy Storage in Li-S Batteries

Nikolas Király<sup>a</sup> Dominika Capková<sup>b</sup> Miroslav Almáši<sup>a</sup> Tomáš Kazda<sup>c</sup> Ondej Čech<sup>c</sup> Pavel Čudek<sup>c</sup> Andrea Straková Fedorková<sup>b</sup> Maxim Lisnichuk<sup>d</sup> Vera Meynen<sup>e</sup> Vladimír Zelenák<sup>\*a</sup>

<sup>a</sup>Department of Inorganic Chemistry, Faculty of Sciences, Pavol Jozef Šafárik University in Košice, Moyzesova 11, 04154, Košice, Slovak Republic

<sup>b</sup>Department of Physical Chemistry, Faculty of Sciences, Pavol Jozef Šafárik University in Košice, Moyzesova 11, 04154, Košice, Slovak Republic

<sup>c</sup>Department of Electrical and Electronic Technology, Faculty of Electrical Engineering and Communication, Brno University of Technology, Technická 10, 616 00, Brno, Czech Republic

<sup>d</sup>Institute of Physics, Faculty of Sciences, Pavol Jozef Šafárik University in Košice, Park Angelinum 9, 04001 Košice, Slovak Republic

<sup>e</sup>Laboratory of Adsorption and Catalysis (LADCA), Department of Chemistry, University of Antwerp, Universiteitsplein 1, 2610 Wilrijk, Belgium

\*Corresponding author e-mail: vladimir.zelenak@upjs.sk

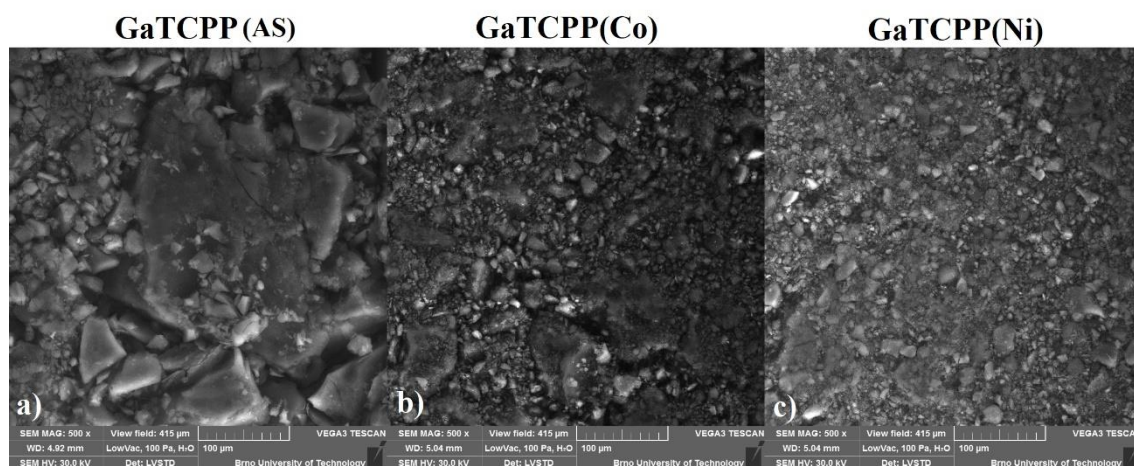

Fig. S 1 The SEM images of GaTCPP materials a) for GaTCPP(AS), b) for GaTCPP(Co) and c) for GaTCPP(Ni).

Table S1 Summarization of the atomic and mass concentration of the elements in GaTCPP materials.

| <b>GaTCPP(AS)</b> | <b>Atomic conc. [%]</b> | <b>Error [%]</b> | <b>Mass conc. [%]</b> | <b>Error [%]</b> |
|-------------------|-------------------------|------------------|-----------------------|------------------|
| <b>C</b>          | 72.91                   | 0.64             | 61.26                 | 0.62             |
| <b>N</b>          | 9.72                    | 0.64             | 9.52                  | 0.63             |
| <b>O</b>          | 14.78                   | 0.38             | 16.54                 | 0.42             |
| <b>Ga</b>         | 2.60                    | 0.08             | 12.68                 | 0.33             |

| <b>GaTCPP(Co)</b> | <b>Atomic conc. [%]</b> | <b>Error [%]</b> | <b>Mass conc. [%]</b> | <b>Error [%]</b> |
|-------------------|-------------------------|------------------|-----------------------|------------------|
| <b>C</b>          | 67.90                   | 0.64             | 54.43                 | 0.67             |
| <b>N</b>          | 11.82                   | 0.60             | 11.05                 | 0.56             |
| <b>O</b>          | 16.60                   | 0.43             | 17.72                 | 0.46             |
| <b>Co</b>         | 0.45                    | 0.14             | 1.75                  | 0.55             |
| <b>Ga</b>         | 3.24                    | 0.10             | 15.06                 | 0.40             |

| <b>GaTCPP(Ni)</b> | <b>Atomic conc. [%]</b> | <b>Error [%]</b> | <b>Mass conc. [%]</b> | <b>Error [%]</b> |
|-------------------|-------------------------|------------------|-----------------------|------------------|
| <b>C</b>          | 66.33                   | 0.53             | 52.97                 | 0.50             |
| <b>N</b>          | 13.67                   | 0.50             | 12.73                 | 0.47             |
| <b>O</b>          | 16.32                   | 0.35             | 17.36                 | 0.37             |
| <b>Ni</b>         | 0.12                    | 0.05             | 0.47                  | 0.21             |
| <b>Ga</b>         | 3.55                    | 0.08             | 16.48                 | 0.33             |

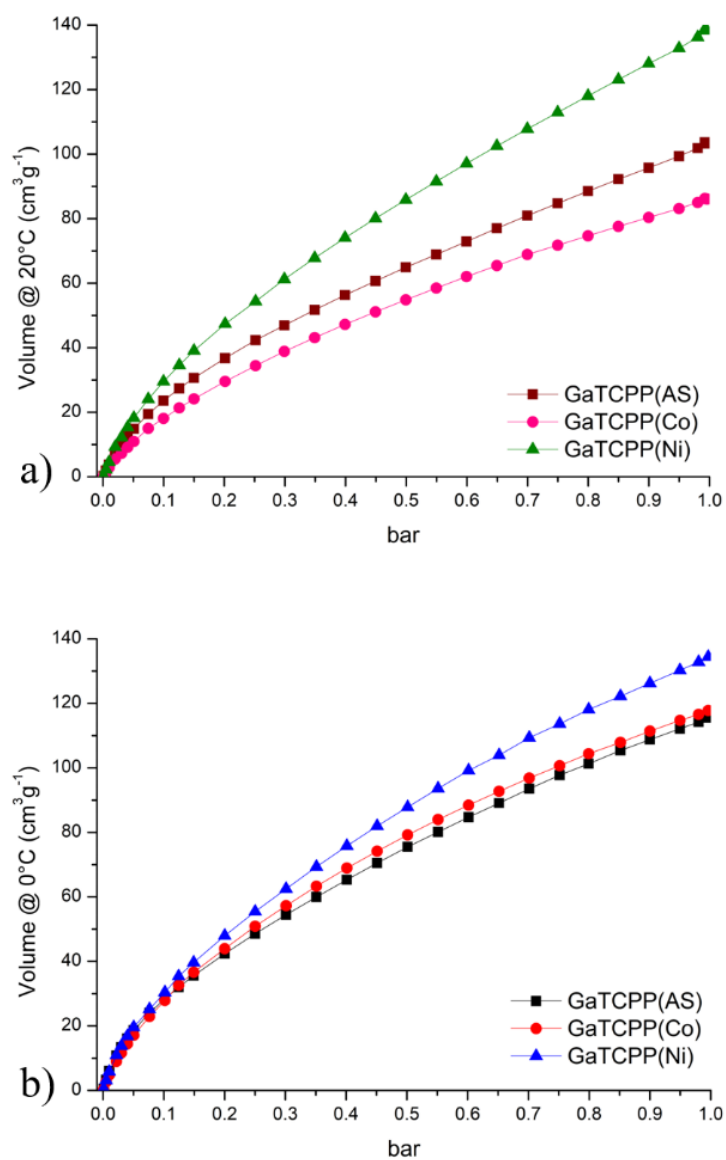

Fig. S 2 a) CO<sub>2</sub> uptake at 20 °C b) CO<sub>2</sub> uptake at 0 °C, for **GaTCPP(AS)**, **GaTCPP(Co)** and **GaTCPP(Ni)**.
